# Supplementary material for: TRIB2 contributes to cisplatin resistance in small cell lung cancer
Source: PubMed Central journal article supplement (PMC5752545; doi:10.18632/oncotarget.22741), 2017-11-27
Supplement: oncotarget-08-109596-s001.pdf [file oncotarget-08-109596-s001.pdf]

## **TRIB2 contributes to cisplatin resistance in small cell lung cancer**

### **SUPPLEMENTARY MATERIALS**

#### **Supplementary Data 1: Cell line authentication allele report**

See Supplementary File 1

#### **Supplementary Data 2: Gene list and expression level**

See Supplementary File 2

**Supplementary Data 3: Gene list of expression changes more than 3-folds**

| <b>Downregulated genes</b> | <b>Upregulated genes</b> |
|----------------------------|--------------------------|
| MEP1B                      | ADCY6; MIR4701           |
| SLC17A6                    | TADA3                    |
| ANO4                       | NETO1                    |
| SULT1E1                    | ZNF521                   |
| EPHA5                      | JUP                      |
| MPPED2                     | GTDC2                    |
| LRP1B                      | TRIB2                    |
| CCBE1                      |                          |
| PEG3; ZIM2                 |                          |
| RAB38                      |                          |
| KLHL41; BBS5               |                          |
| CDH12                      |                          |
| GLT8D2                     |                          |
| EBF3                       |                          |
| SLN                        |                          |
| PRRG4                      |                          |
| ANKRD22                    |                          |
| PPEF1                      |                          |
| ASS1                       |                          |
| FEZ1                       |                          |
| SLC18A2                    |                          |
| ATXN1                      |                          |
| TCEA3                      |                          |
| GPR116                     |                          |
| EMP3                       |                          |
| PCDH11Y; PCDH11X           |                          |
| GBP6                       |                          |
| DHRS3                      |                          |
| STAMBPL1                   |                          |
| PTPRD                      |                          |
| DNAJC22                    |                          |
| TUB                        |                          |
| PPP1R1B                    |                          |
| SYTL4                      |                          |
| NMNAT2                     |                          |
| MYBPC2                     |                          |
| SYNGR4                     |                          |
| ATP2B4                     |                          |

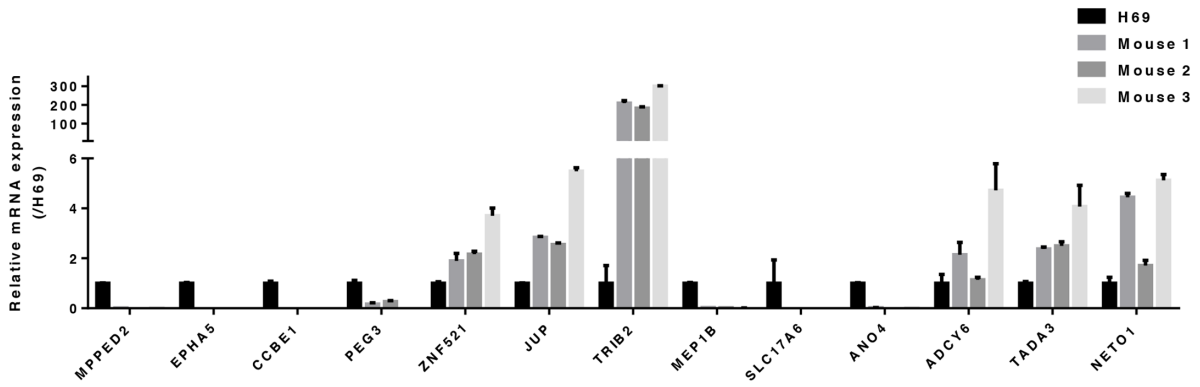

Supplementary Data 4: Relative mRNA expression folds of genes.

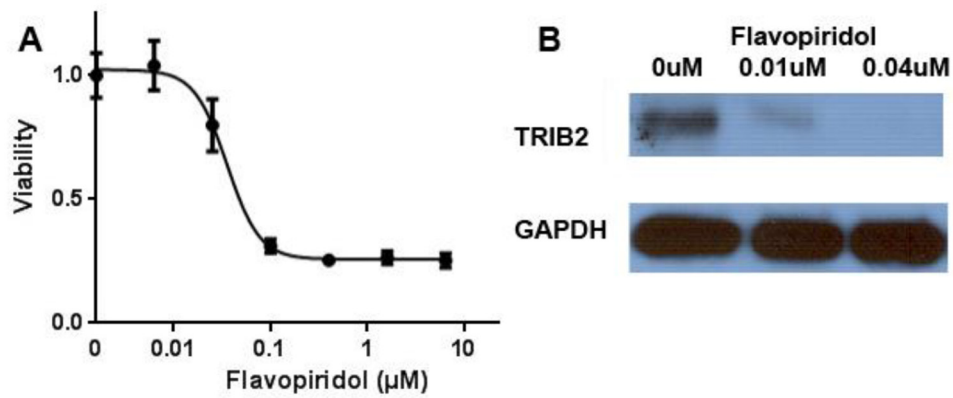

**Supplementary Data 5: Cytotoxicity of Flavopiridol in the CRSC cells.** Cytotoxicity of Flavopiridol was performed with Alamar blue assay. IC<sub>50</sub> and IC<sub>10</sub> of Flavopiridol were 0.03422 μM and 0.0138 μM in the CRSC cells (A). TRIB2 protein was decreased in the CRSC cells treated with Flavopiridol at the concentration of 0.01 μM (<IC<sub>10</sub>) (B).

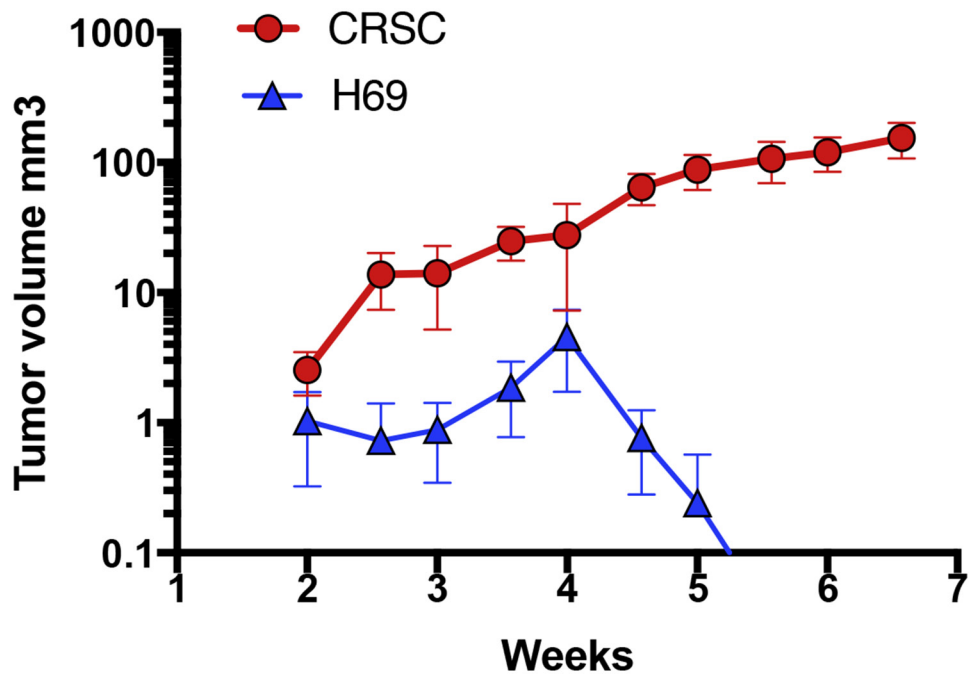

**Supplementary Data 6: Cisplatin -resistance confirmation *in vivo* in same SCID mice.** H69 and CRSC cells were simultaneously inoculated s.c. into the right and left flanks, respectively, of the same mice to ensure that the cells grew in similar environments and receive the same dose of treatment. Cisplatin injection started 4 weeks after the implantation.

## Supplementary Data 7: Cell lines chosen for Cisplatin-resistance study

|        | <sup>a</sup> Cell CDDP tolerance | Tumorigenic | <sup>b</sup> Tumor CDDP tolerance | <sup>c</sup> Cell morphology; Tumor Histology | Original Location | Treatment before sampling |
|--------|----------------------------------|-------------|-----------------------------------|-----------------------------------------------|-------------------|---------------------------|
| H69    | N                                | Y           | Y                                 | Susp; T                                       | Pleural effusion  | Rad + chemi               |
| H82    | N                                | Y           | N                                 | Susp; V                                       | Pleural effusion  | Chemo                     |
| H209   | N                                | Y           | N                                 | Susp; T                                       | Bone marrow       | No                        |
| H345   | N                                | N           | N/A                               | Susp; T                                       | Bone marrow       | Chemo                     |
| H378   | N                                | Y           | N                                 | Susp; T                                       | Pleural effusion  | Chemo                     |
| H446   | N                                | Y           | N                                 | Susp + adhe; V                                | Pleural effusion  | Chemo                     |
| H526   | N                                | Y           | N                                 | Susp; V                                       | Bone marrow       | No                        |
| H660   | N                                | N           | N/A                               | Susp; T                                       | Lymph nodes       | No                        |
| SHP-77 | N                                | Y           | N                                 | Susp & adhe; V                                | Lung              | Radi & Chemo              |

The ideal *in vitro* model to study the Cisplatin-resistant mechanism is to select a cisplatin sensitive cell line and induce the chemoresistance using Cisplatin treatment; if succeed, the resistant cell line and parental cell lines will have the same genetic background.

We checked all of the following ATCC's SCLC cell lines. The criteria for selecting are: sensitive to high dose but tolerate to low dose of cisplatin, classical SCLC histology/morphology, and tumorigenicity. We got 9 cell lines from ATCC and tested all of them. Their characters and the test results of cisplatin tolerance and tumorigenicity are listed in the following table.

a: The tolerance means the cells can survive in the culture medium containing  $\leq 0.1 \mu\text{M}$  of Cisplatin for  $\geq 3$  month.

b: The tolerance means the sc xenograft tumor ( $\geq 5$  mm in diameter) in mice cannot be clear out by intravenous injections of cisplatin at 10 mg/kg/week in 2 month.

c: Where "T" and "V" means typical and variant SCLC, separately, based on the ATCC's description.
